# Supplementary material
Source: publisher site journal article supplement (https://www.dovepress.com/article/226601)
Supplement: Supplementary file 1 [file get_supplementary_file.php]

**SUPPLEMENTARY MATERIAL**

**Supplementary Table 1. Summary of MACE in Japan subgroup and overall study population (ITT populations)**

|  | **Japan** | | | **Overall** | | |
| --- | --- | --- | --- | --- | --- | --- |
| **MACE incidence, n (%)** | **FF/UMEC/VI**  **n=149** | **FF/VI**  **n=149** | **UMEC/VI**  **n=80** | **FF/UMEC/VI**  **n=4151** | **FF/VI**  **n=4134** | **UMEC/VI**  **n=2070** |
| **Any MACE (narrow definition*)** | 0 | 1 (<1) | 1 (1) | 80 (2) | 60 (1) | 37 (2) |
| **Any MACE (broad definition**†**)** | 2 (1) | 1 (<1) | 1 (1) | 133 (3) | 100 (2) | 66 (3) |

*The narrow definition of MACE included preferred terms for non-fatal myocardial infarction and non-fatal acute myocardial infarction, central nervous system hemorrhages and cerebrovascular conditions SMQ excluding fatalities and adjudicated cardiovascular deaths; †The broad definition of MACE included ischemic heart disease SMQ (myocardial infraction SMQ and other ischemic heart disease SMQ) excluding fatalities, the central nervous system hemorrhages and cardiovascular condition SMQ excluding fatalities and adjudicated cardiovascular deaths.

FF, fluticasone furoate; ITT, intent-to-treat; MACE, major cardiovascular event; SMQ, Standardized MedDRA (Medical Dictionary for Regulatory Activities) query; UMEC, umeclidinium; VI, vilanterol.
